# Supplementary material for: Electrochemical sensing application of poly(acrylic acid modified EDOT-co-EDOT):PSS and its inorganic nanocomposite with high soaking stability, adhesion ability and flexibility
Source: Royal Society of Chemistry journal article supplement (doi:10.1039/c4ra10970h), 2015-01-01
Supplement: c4ra10970h1.pdf [file c4ra10970h1.pdf]

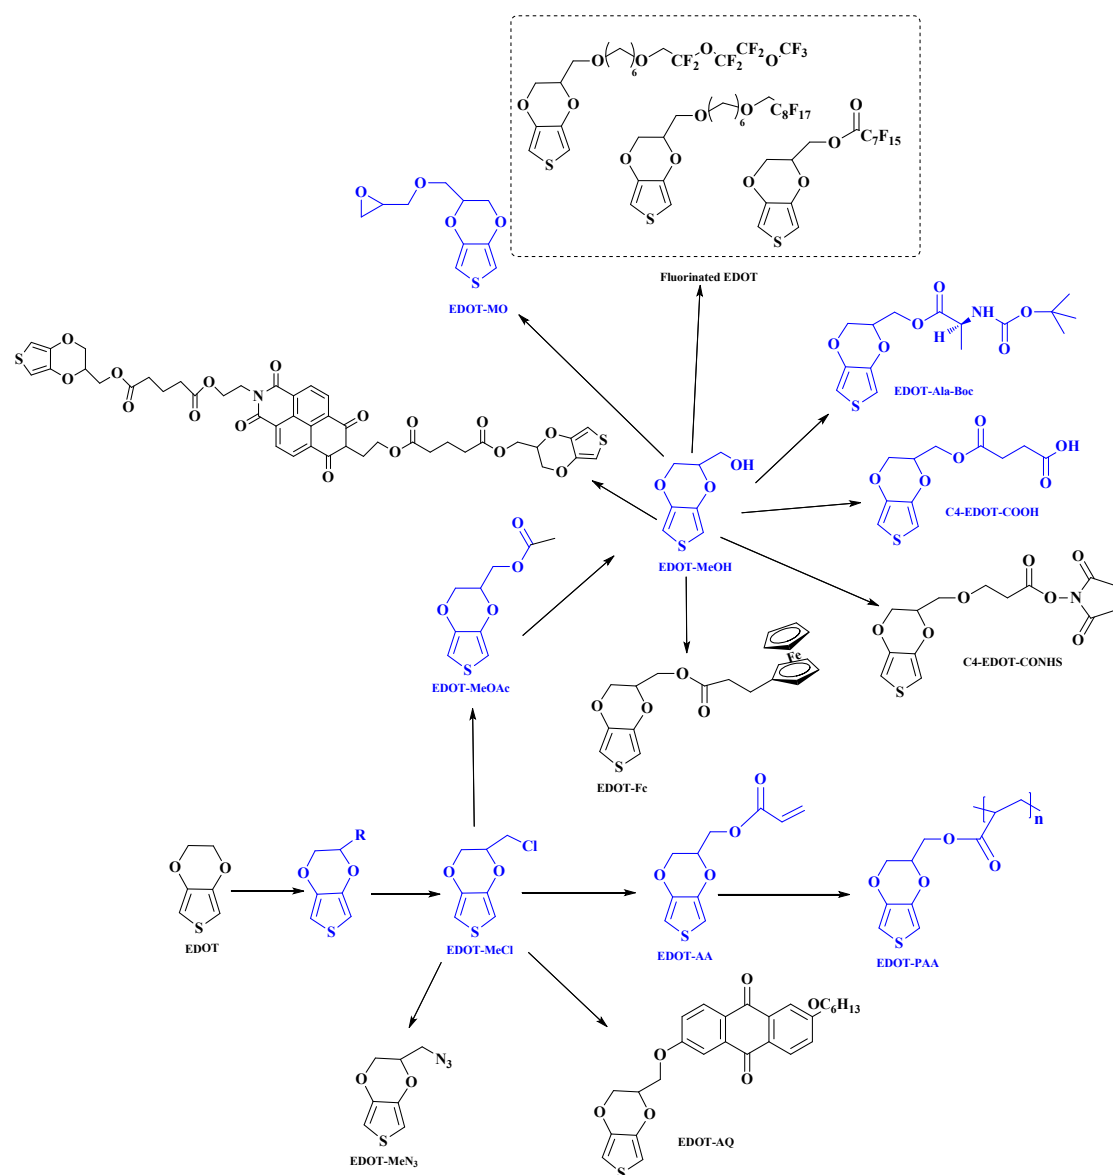

**Scheme S1** Different EDOT derivatives in the recent literature. Our group also synthesized a variety of EDOT derivatives (blue structures).



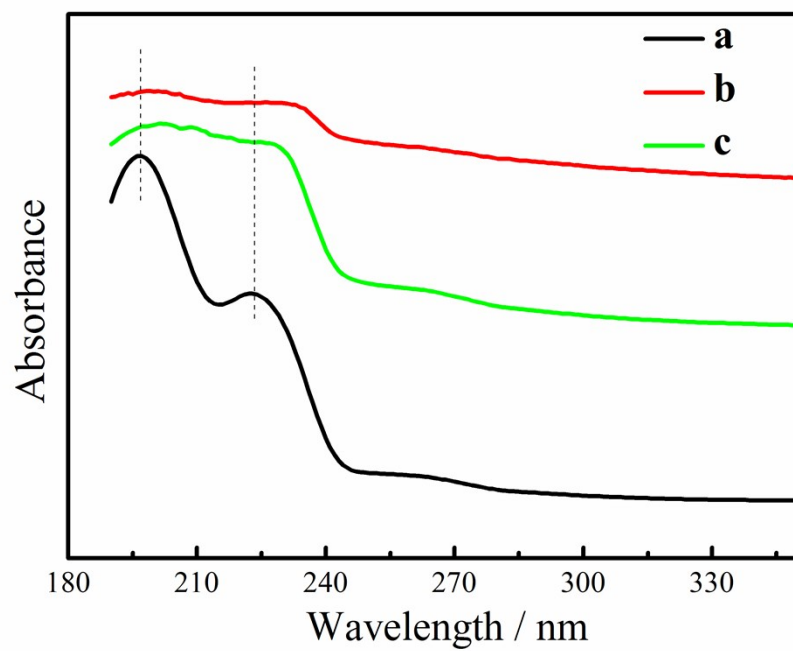

**Figure S1** UV-vis spectra of poly(EDOT-*co*-EDOT-AA):PSS (a), poly(EDOT-*co*-EDOT-AA):PSS-GR (b), and poly(EDOT-*co*-EDOT-AA):PSS-HNPs-CMC (c).

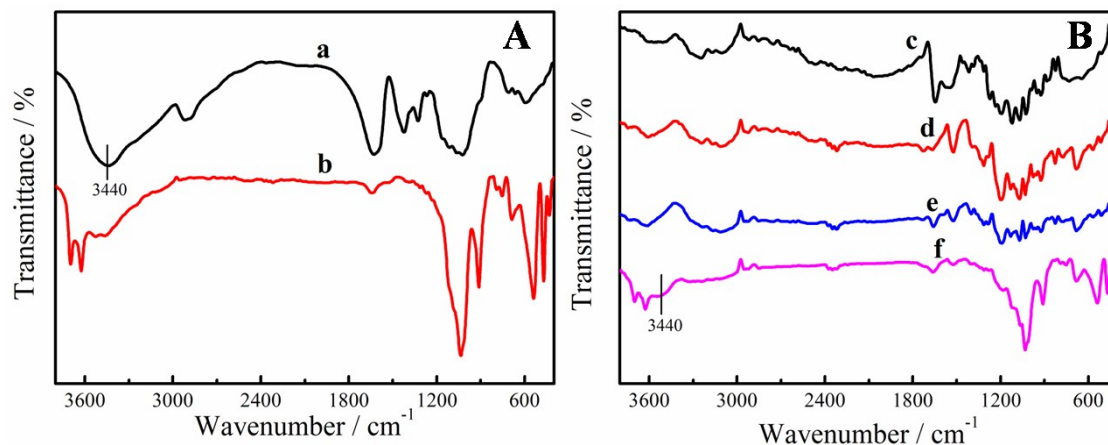

**Figure S2** FTIR spectra of CMC (a), HNPs (b), GR (c), poly(EDOT-*co*-EDOT-AA):PSS (d), poly(EDOT-*co*-EDOT-AA):PSS-GR (e), and poly(EDOT-*co*-EDOT-AA):PSS-HNPs-CMC (f) in the range of 3800–400 cm<sup>-1</sup>.

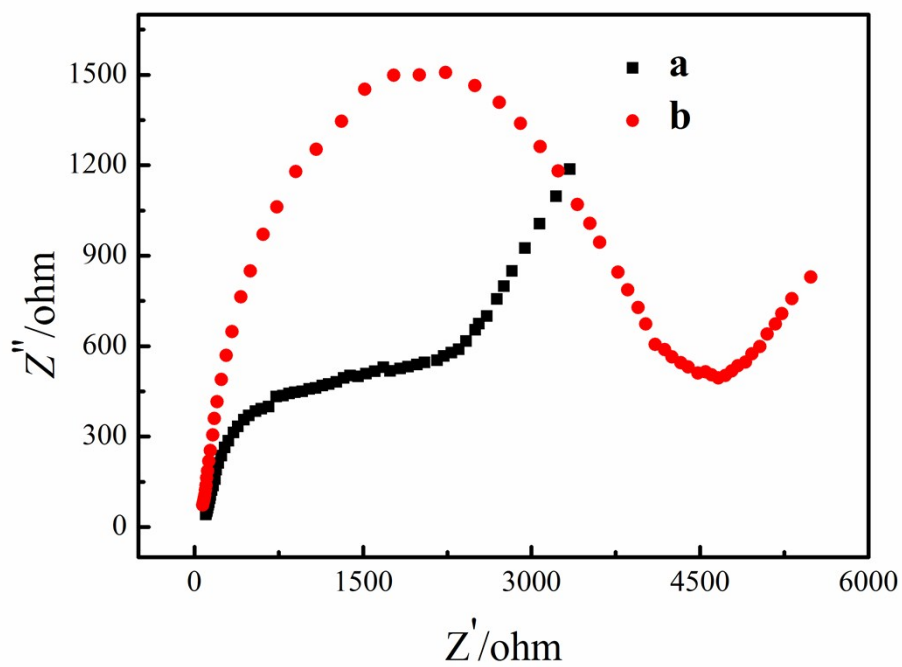

**Figure S3** Nyquist plots of GR/GCE (a) and HNP-CMC/GCE (b) electrodes in 10 mM  $[\text{Fe}(\text{CN})_6]^{4-/3-}$  solution containing 0.1 M KCl.

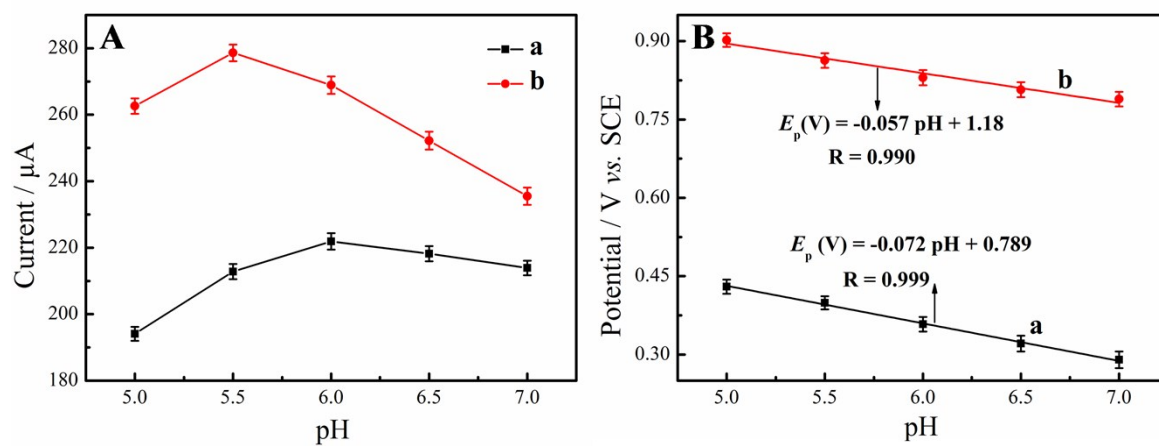

**Figure S4** Effect of pH on the peak currents (A) and peak potentials (B) for the oxidation of 100  $\mu\text{M}$  Ep (a) and 200  $\mu\text{M}$  Trp (b) on poly(EDOT-*co*-EDOT-AA):PSS/GCE.

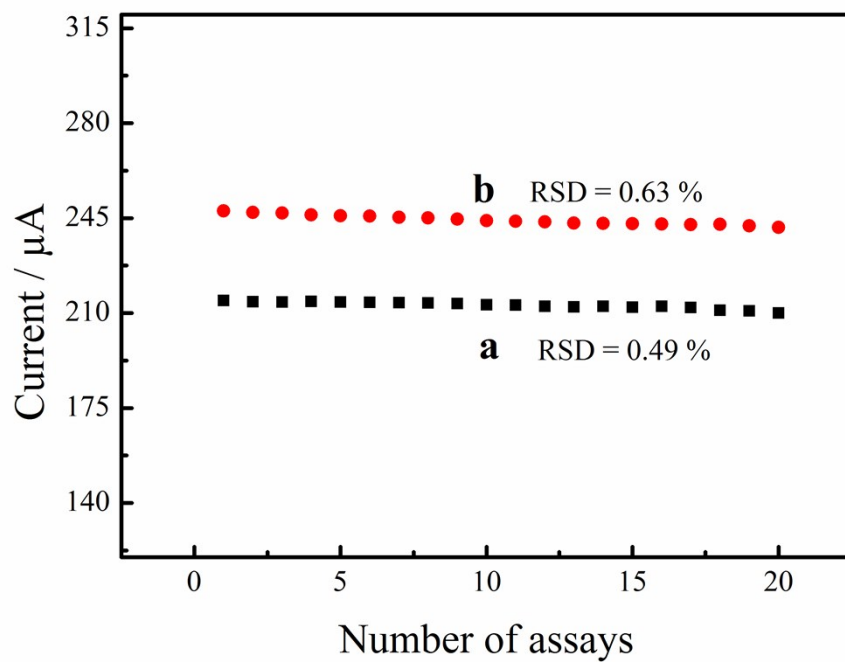

**Figure S5** Operational stability for the electrochemical detection of both Ep and Trp of poly(EDOT-*co*-EDOT-AA):PSS/GCE.

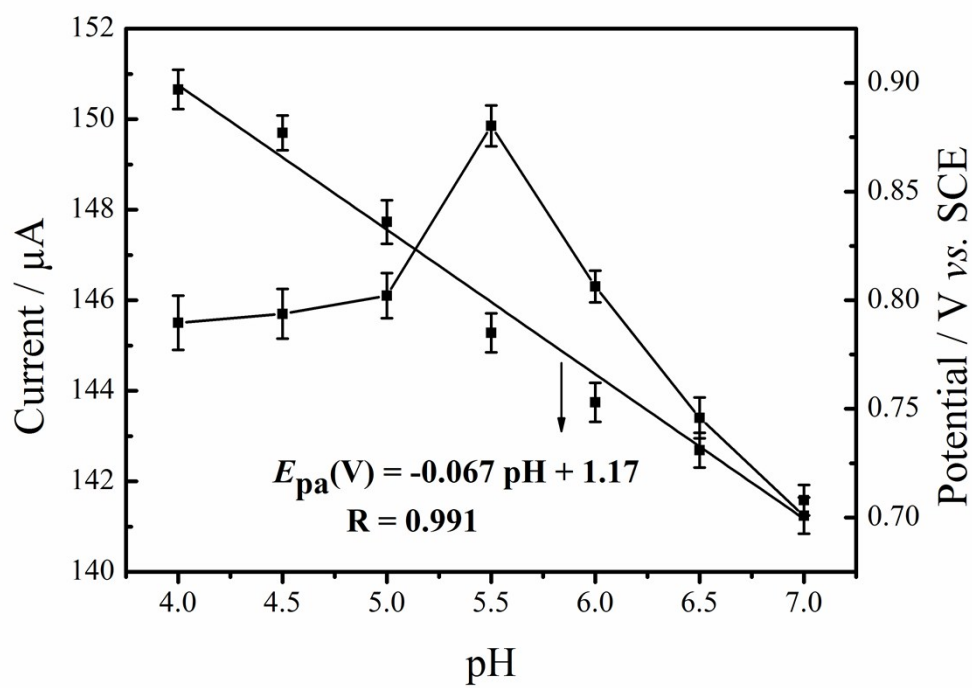

**Figure S6** Effect of pH on the peak currents and peak potentials for the oxidation of 200  $\mu\text{M}$  MH on poly(EDOT-*co*-EDOT-AA):PSS-GR/GCE.



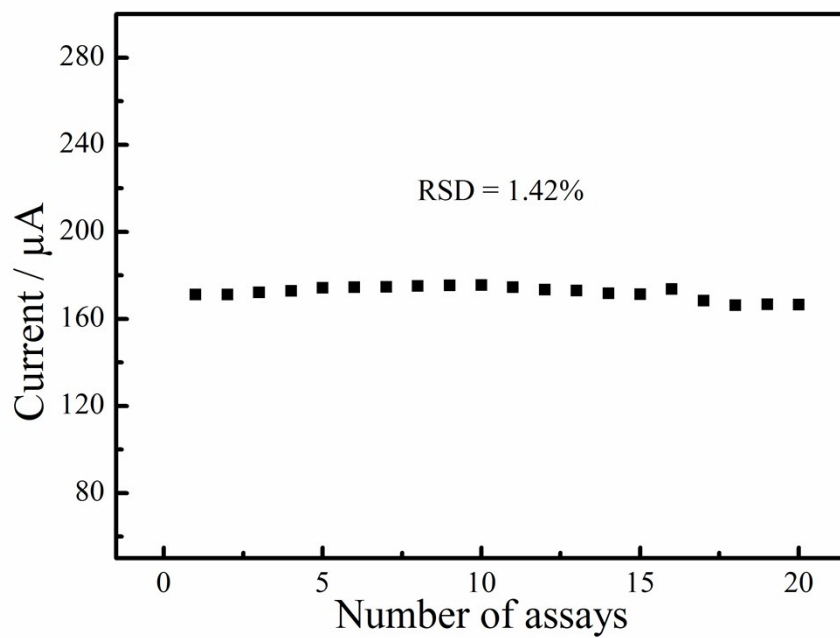

**Figure S7** Operational stability for the electrochemical detection of MH of poly(EDOT-*co*-EDOT-AA):PSS-GR/GCE.

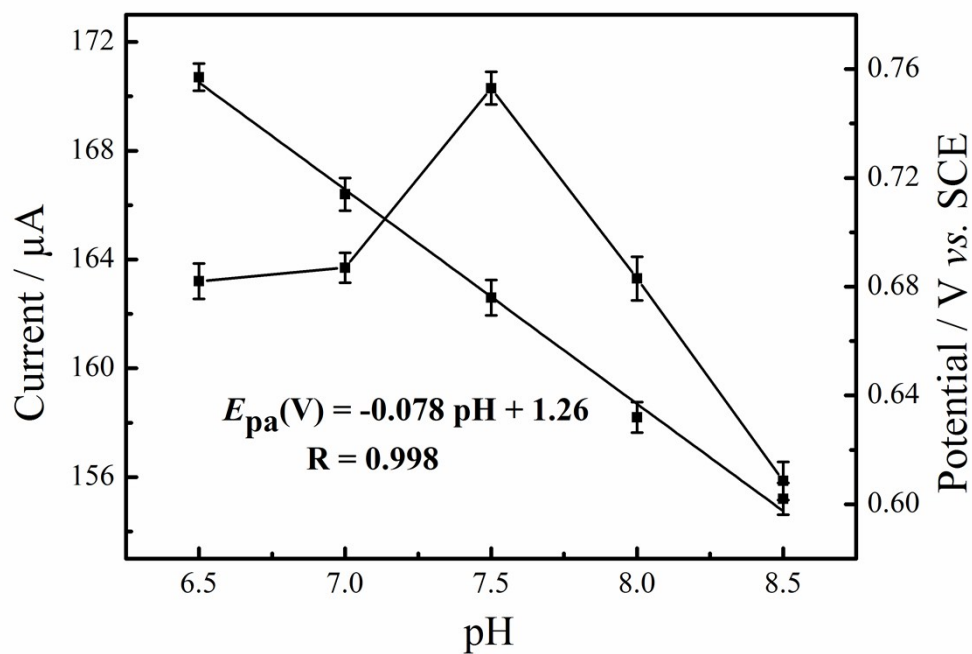

**Figure S8** Effect of pH on the peak currents and peak potentials for the oxidation of 200  $\mu\text{M}$  VB<sub>6</sub> on poly(EDOT-co-EDOT-AA):PSS-HNPs-CMC/GCE.

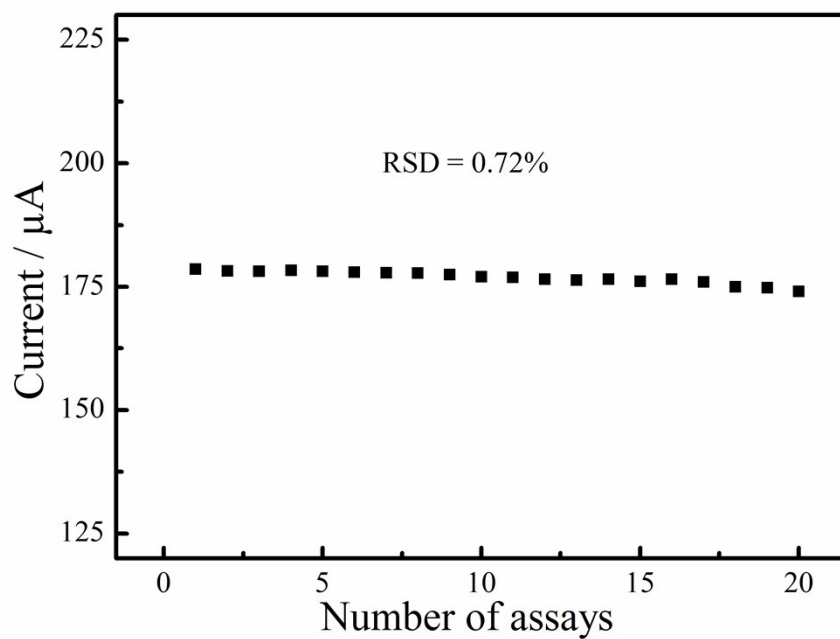

**Figure S9** Operational stability for the electrochemical detection of  $\text{VB}_6$  of poly(EDOT-*co*-EDOT-AA):PSS-HNPs-CMC/GCE.
